# Supplementary material
Source: PubMed Central journal article supplement (PMC3399738)
Supplement: NIHMS391555-supplement-Fig_S1.pdf [file NIHMS391555-supplement-Fig_S1.pdf]

1: NSC4921

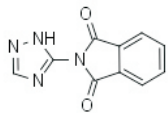

2: NSC19063

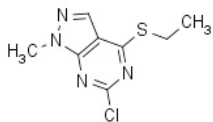

3: NSC21678

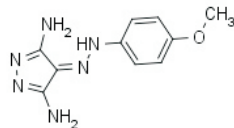

4: NSC339578

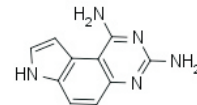

5: NSC135810

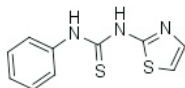

6: NSC126757

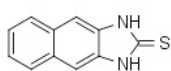

7: NSC139257

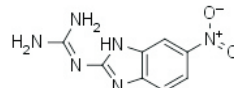

8: NSC234945

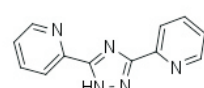

9: NSC339578

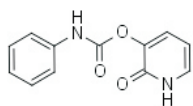

10: NSC109231

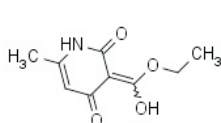

11: NSC92207

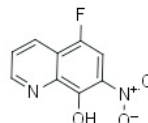

12: NSC93817

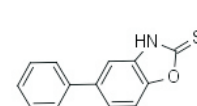

13: NSC57624

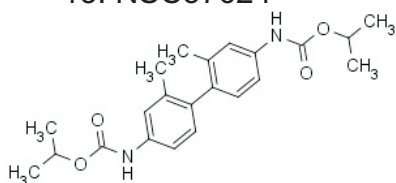

14: NSC13800

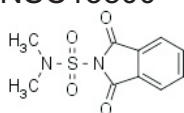

15: NSC26744

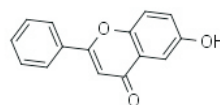

16: NSC121268

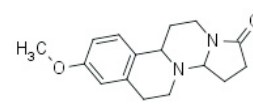

17: NSC121268

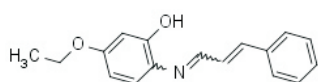

18: NSC7223

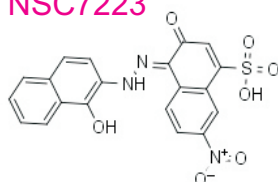

19: NSC15520

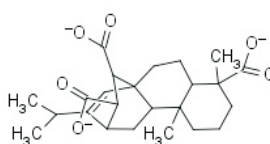

20: NSC21588

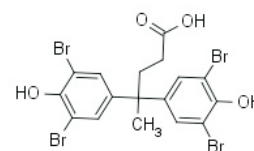

21: NSC308847

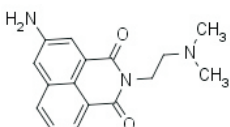

22: NSC73753

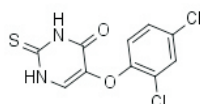

23: NSC453792

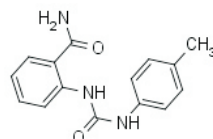

24: NSC175743

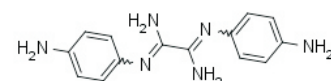

25: NSC378711

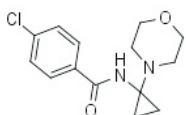

26: NSC400938

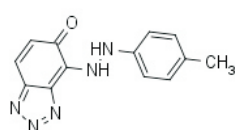

27: NSC95909

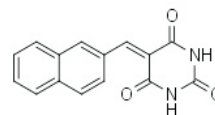

28: NSC108783

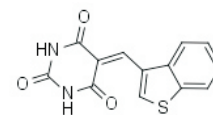

29: NSC111847

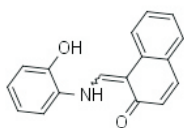

30: NSC57624

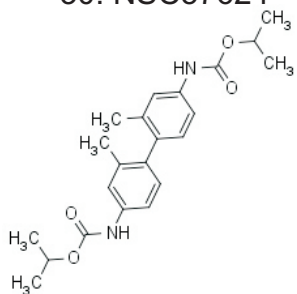

31: NSC50650

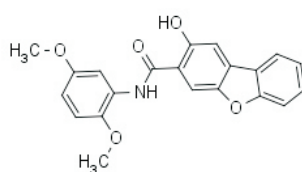

32: NSC91340

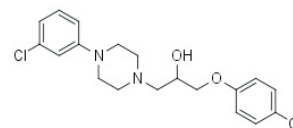

33: NSC63680

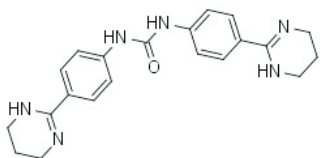

34: NSC353263

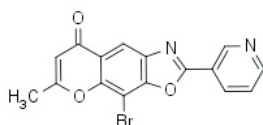

35: NSC377852

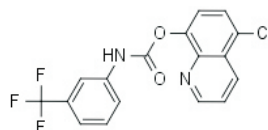

36: NSC601359

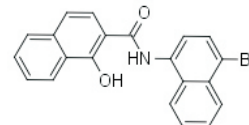

37: NSC19083

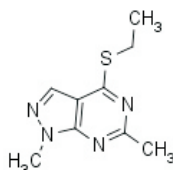

38: NSC67436

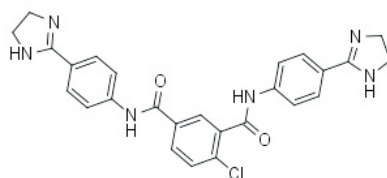

39: NSC32984

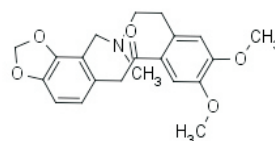

40: NSC366807

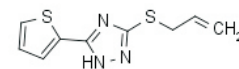

41: NSC402083

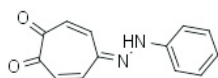

42: NSC638080

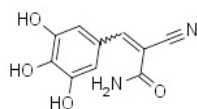

43: NSC638134

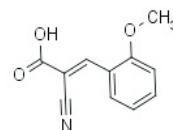

44: NSC5426

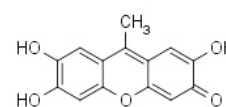

Supplementary Fig. 1 Structure of compounds used Fig 4. Excluded compounds are labeled red
